# Supplementary material for: Nuciferine improves high-fat diet-induced obesity via reducing intestinal permeability by increasing autophagy and remodeling the gut microbiota
Source: Royal Society of Chemistry journal article supplement (doi:10.1039/d1fo00367d), 2021-01-01

# 1 Supplementary Figure Legends

2 **Supplementary figure 1.** The protein levels of Atg5 were depleted by siRNA. Western blot analysis  
3 and quantification of Atg5 were shown in Caco-2 (A-B) and HT-29 (C-D) cells,  $\beta$ -Actin served as  
4 an internal control. Data are expressed as mean $\pm$ SD. \*\*  $p < 0.01$  versus Control group.

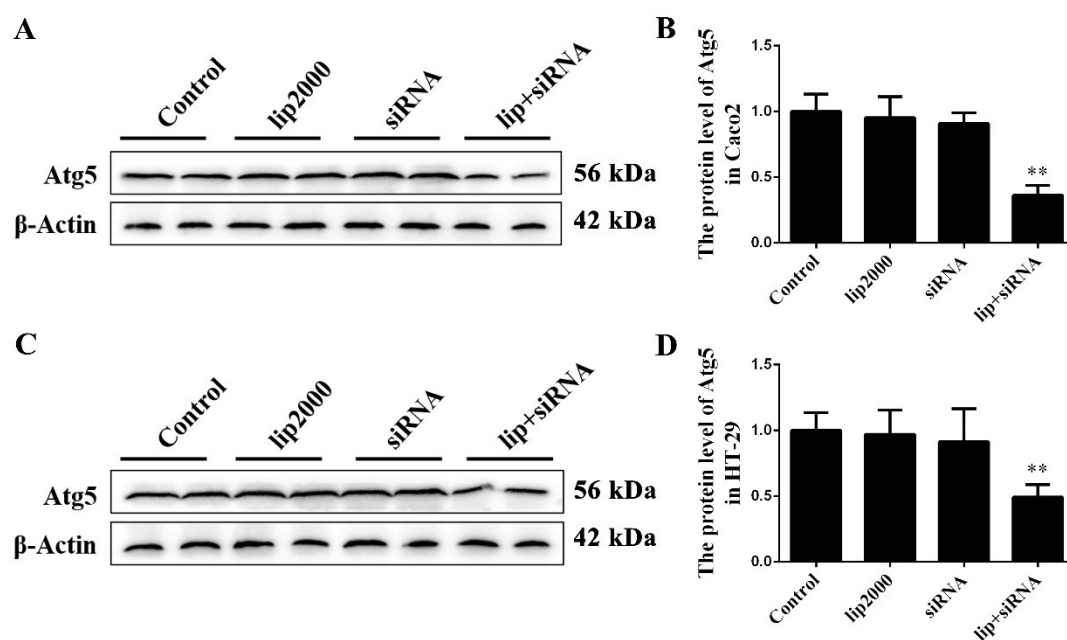

Supplement: d1fo00367d1.pdf [file d1fo00367d1.pdf]
